# Supplementary material for: Synthesis of Au nanoparticle doped SiO2–TiO2 films: tuning of Au surface plasmon band position through controlling the refractive index
Source: Royal Society of Chemistry journal article supplement (doi:10.1039/b506399j), 2005-01-01
Supplement: b506399j.pdf [file b506399j.pdf]

**Synthesis of Au-nanoparticle doped SiO<sub>2</sub>-TiO<sub>2</sub> films: tuning of Au-surface plasmon band position through controlling the refractive index**

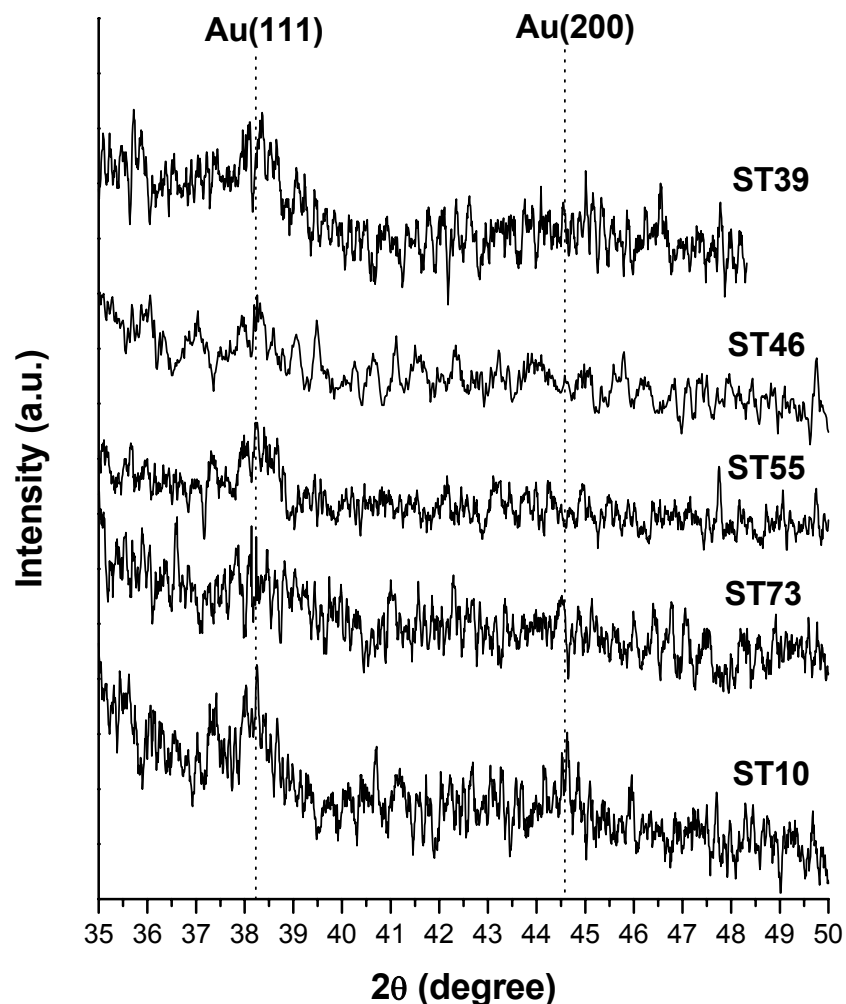

**Supplementary Fig. A**

X-ray diffraction spectra of the Au doped films heat-treated at 500°C. Peaks corresponding to Au (111) and (200) are shown.

*Medda, De and De, J.Mater. Chem. 2005*

Supplementary Material (ESI) for Journal of Materials Chemistry  
This journal is © The Royal Society of Chemistry 2005

**Synthesis of Au-nanoparticle doped SiO<sub>2</sub>-TiO<sub>2</sub> films: tuning of Au-surface plasmon band position through controlling the refractive index**

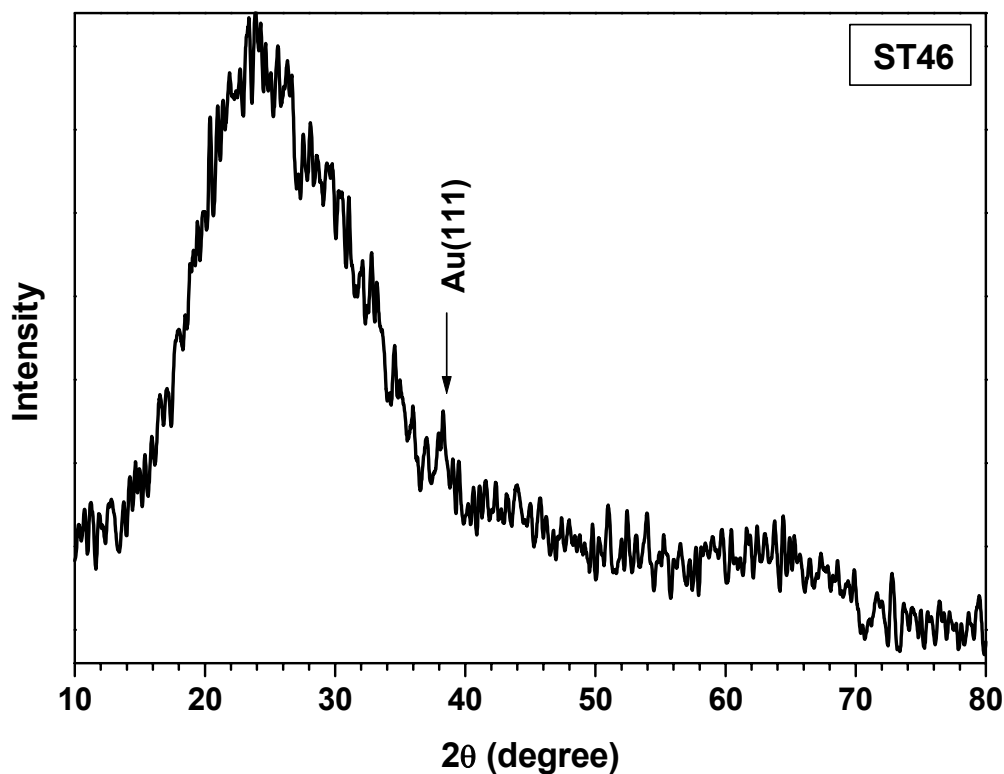

**Supplementary Fig. B**

X-ray diffraction spectrum of the Au doped ST46 film heat-treated at 500°C, showing absence of any peak related to the crystalline TiO<sub>2</sub> phases.

*Medda, De and De, J.Mater. Chem. 2005*
